# Supplementary figures and images for: Acid-base balance and hydration status following consumption of mineral-based alkaline bottled water
Source: Springer Nature journal article supplement (doi:10.1186/1550-2783-7-29), 2010-01-05

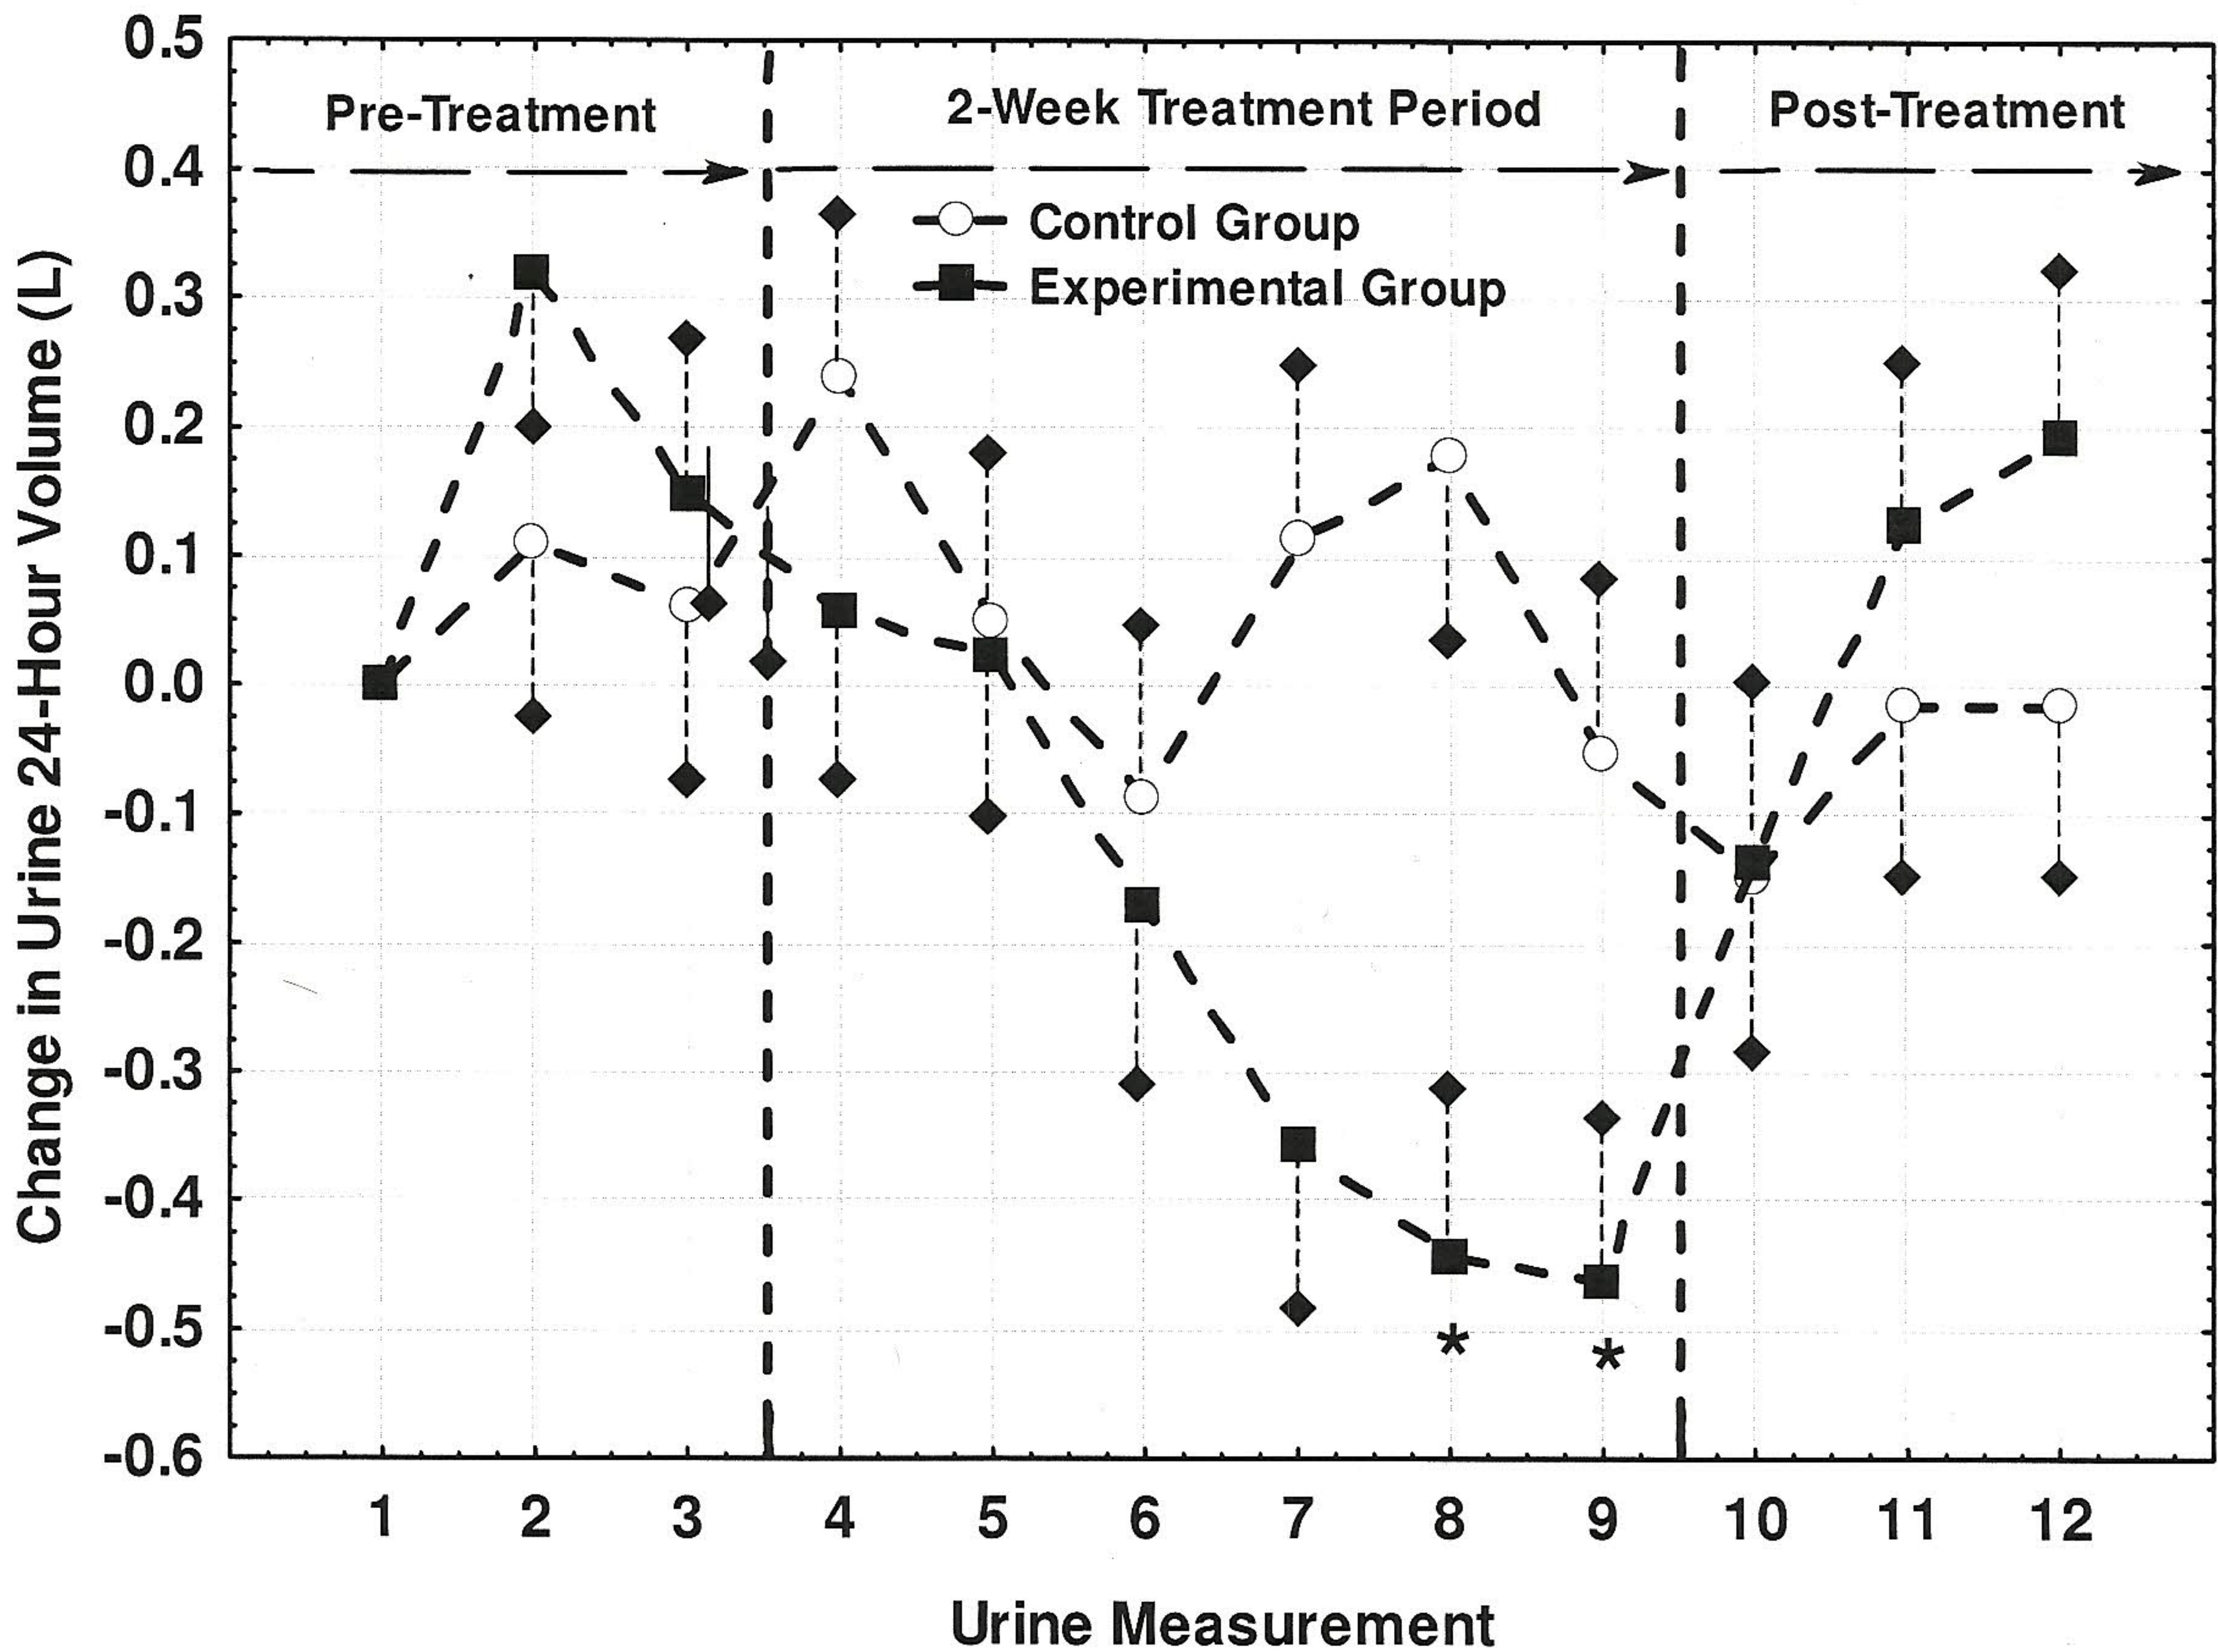

Supplement: 12970_2010_179_MOESM1_ESM.pdf [file 12970_2010_179_MOESM1_ESM.pdf]

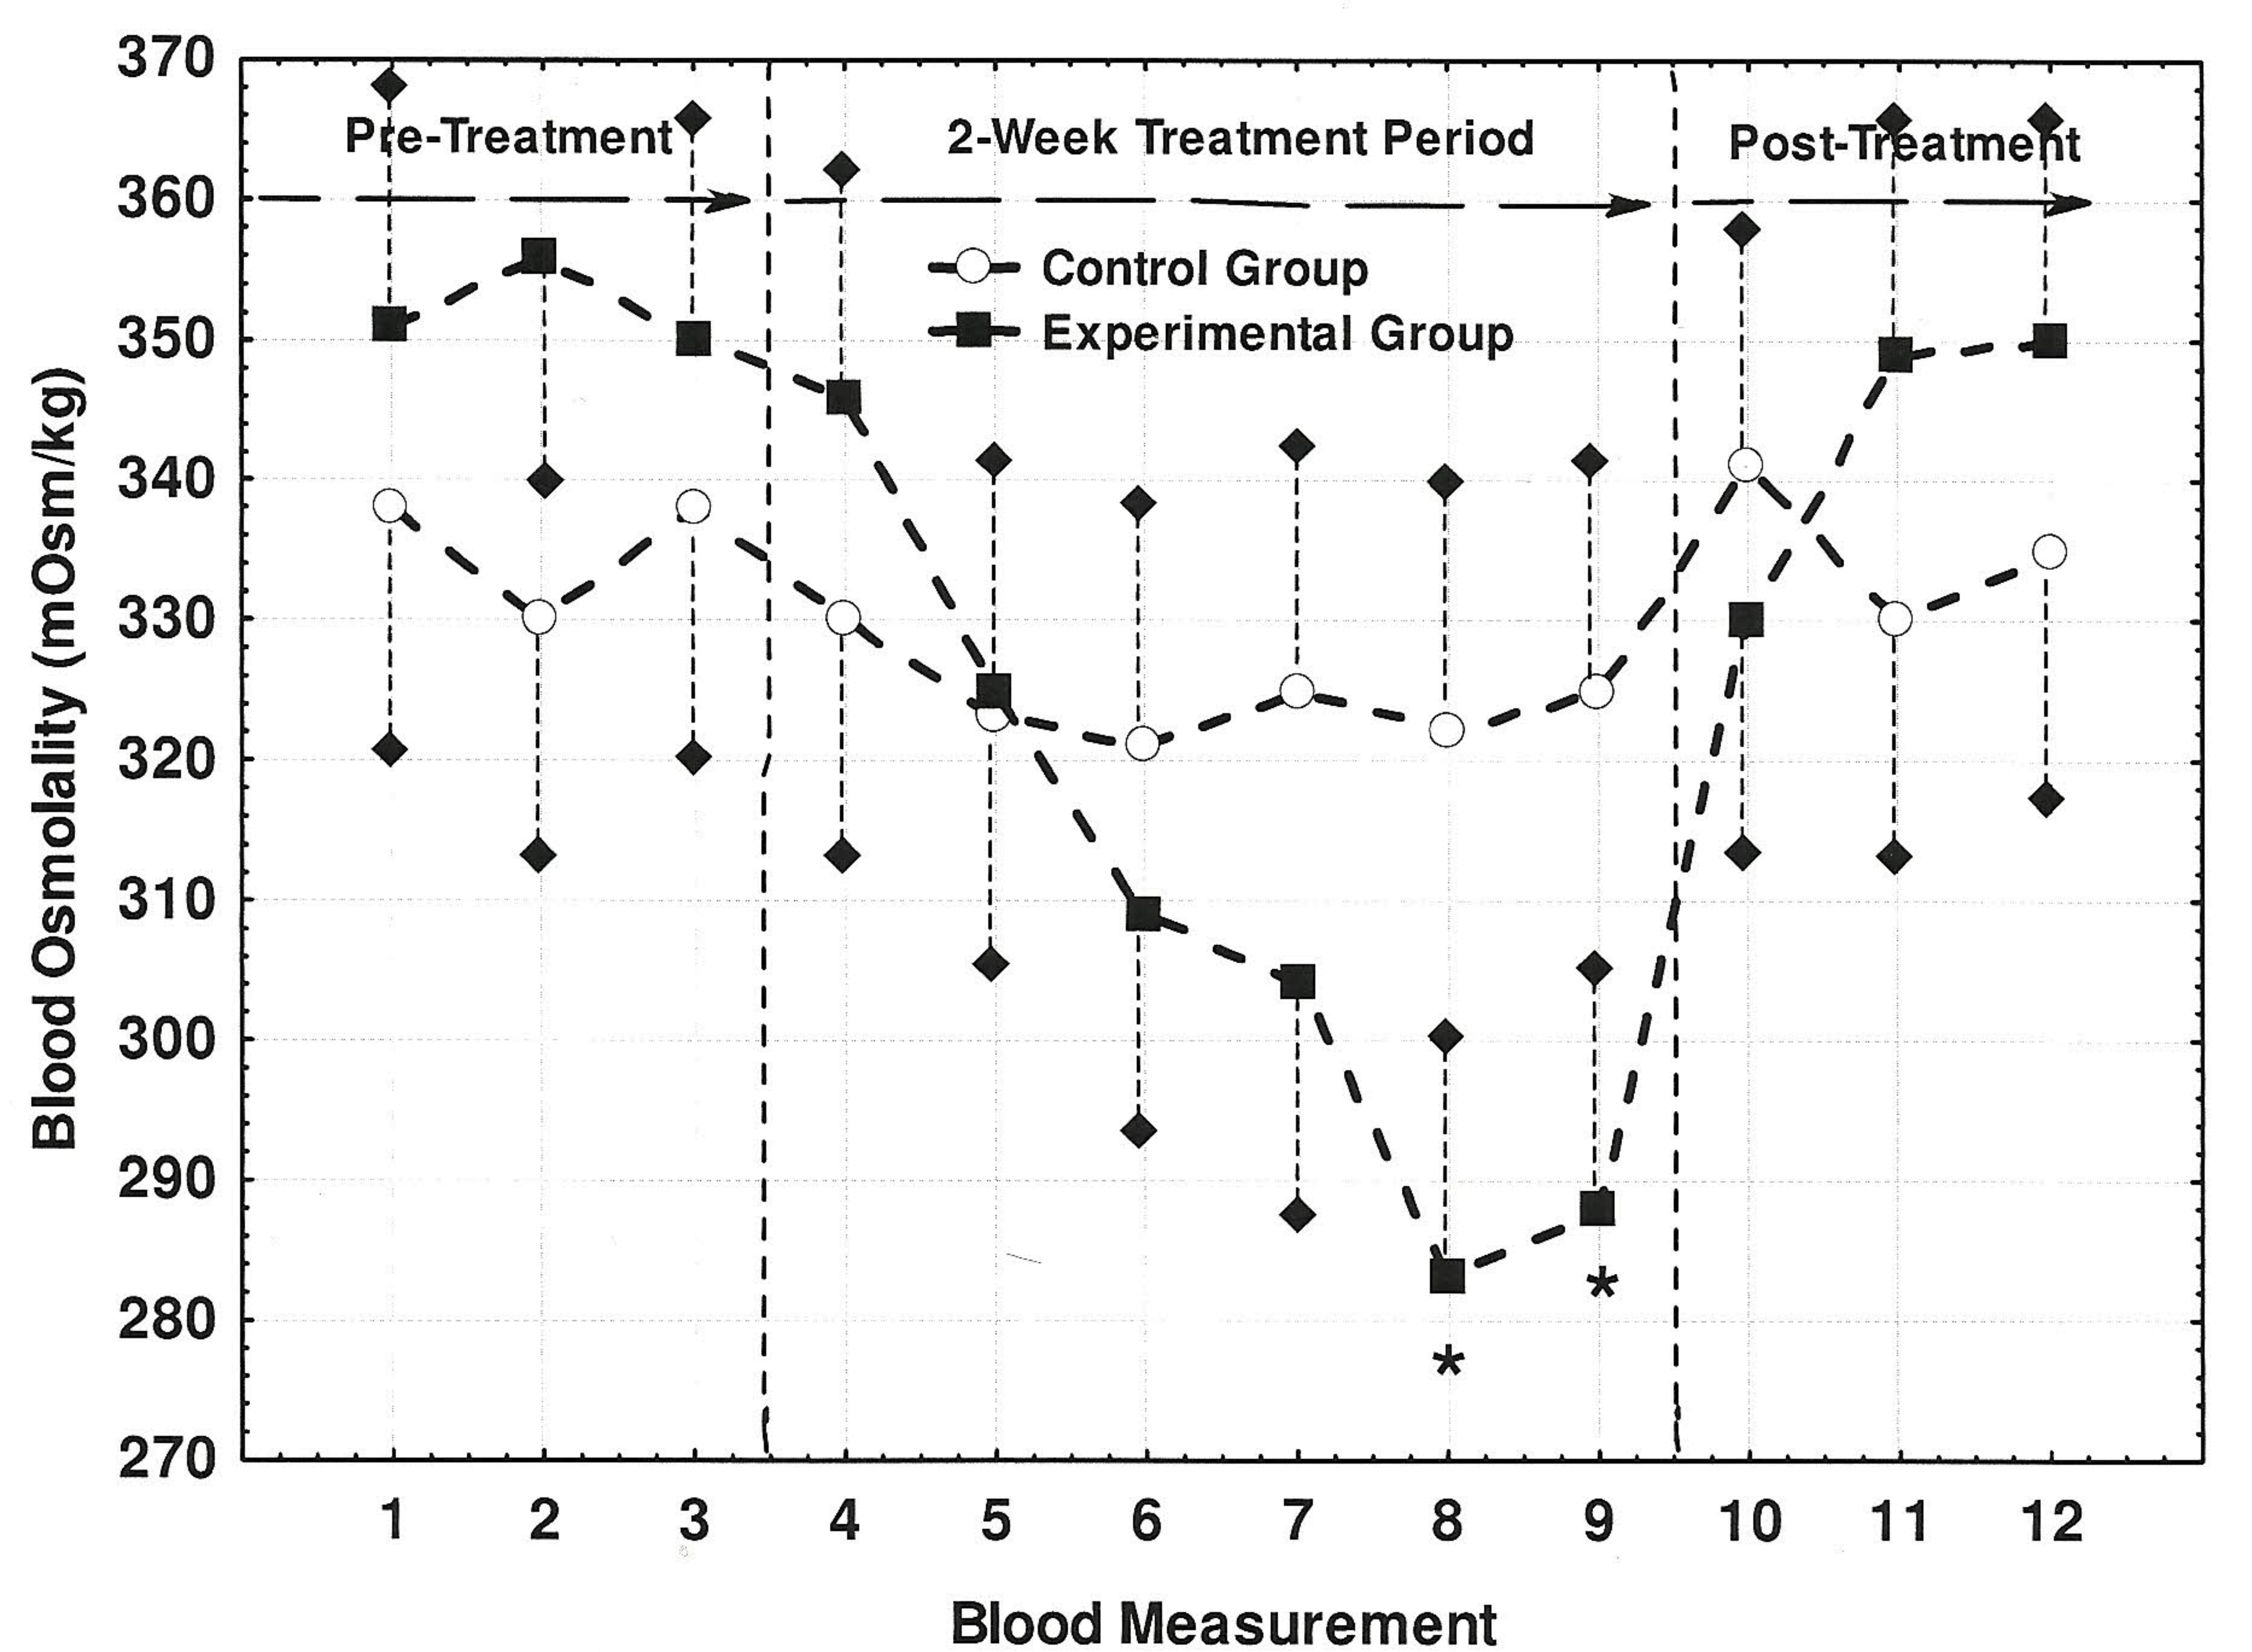

Supplement: 12970_2010_179_MOESM2_ESM.pdf [file 12970_2010_179_MOESM2_ESM.pdf]

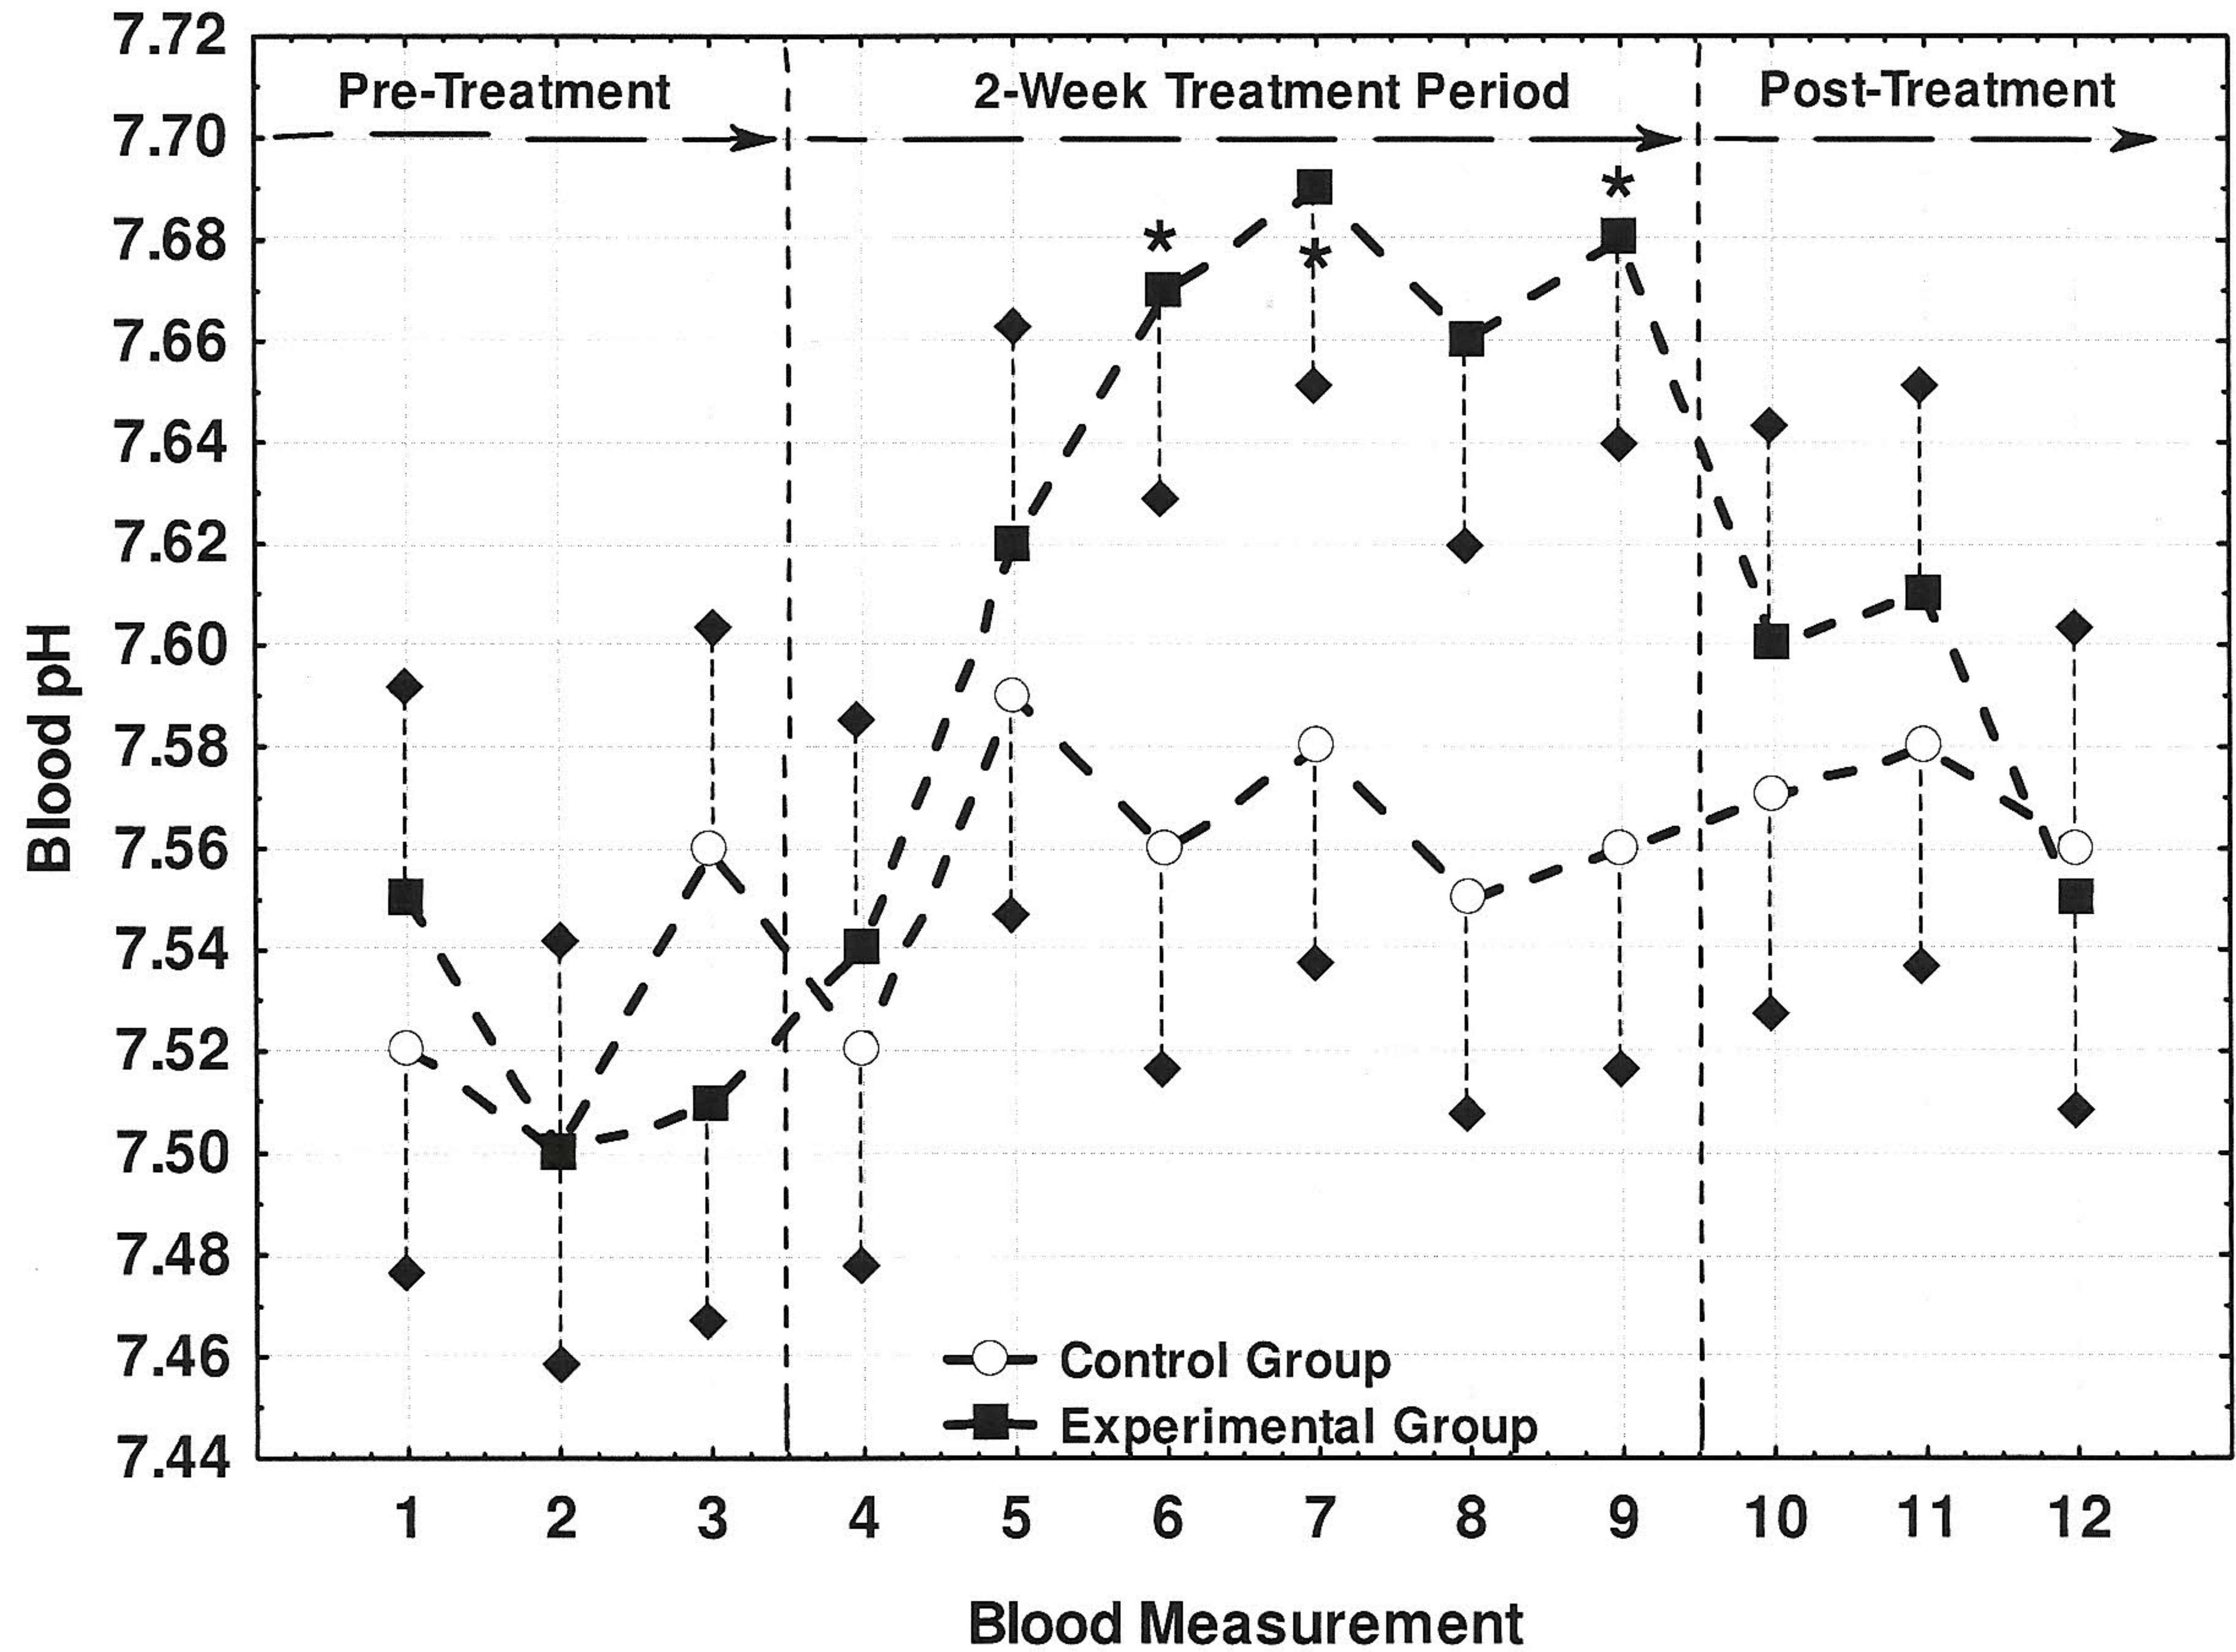

Supplement: 12970_2010_179_MOESM3_ESM.pdf [file 12970_2010_179_MOESM3_ESM.pdf]
